# Supplementary material
Source: PubMed Central journal article supplement (PMC5875419)
Supplement: NIHMS952653-supplement-supplemental_figures.pdf [file NIHMS952653-supplement-supplemental_figures.pdf]

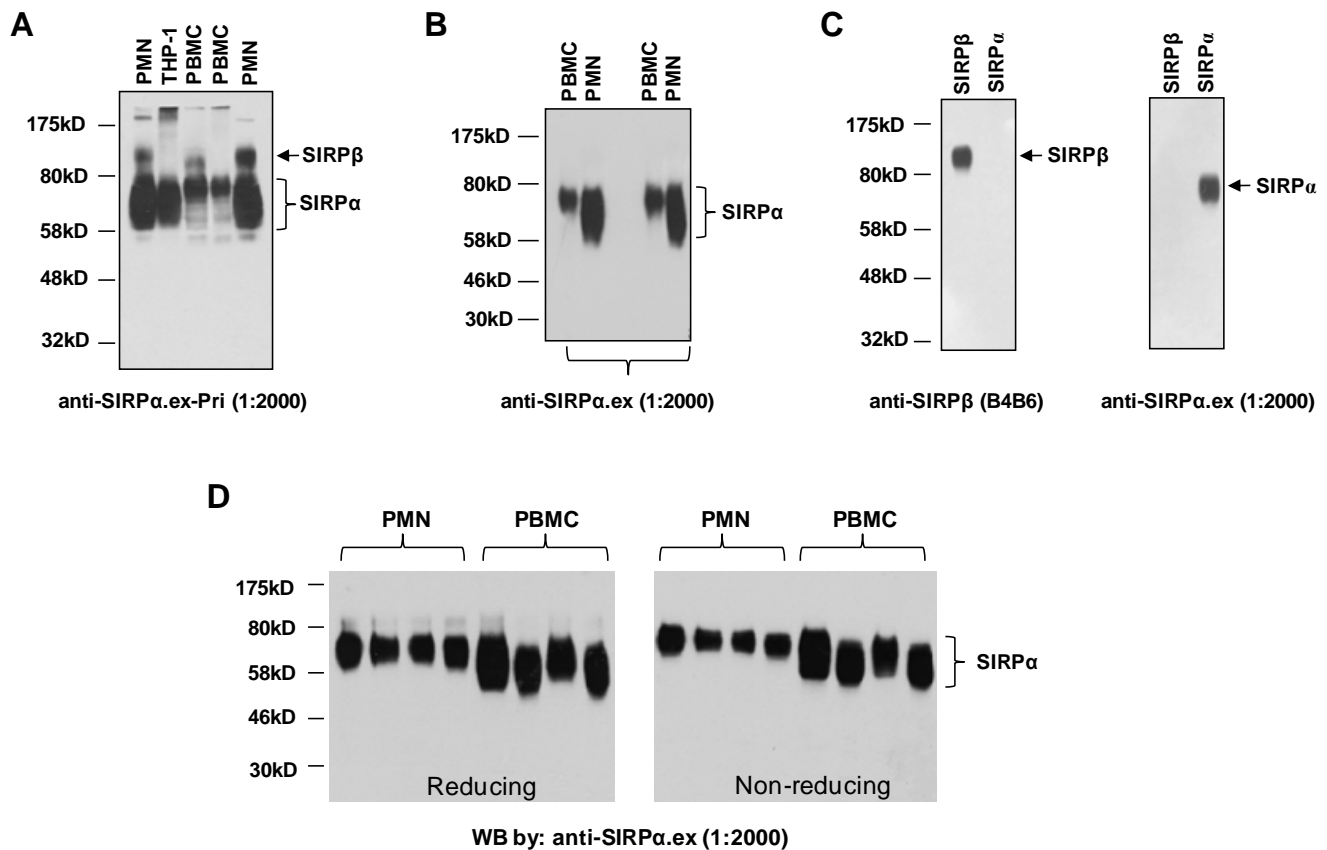

Supplementary Figure S1. **Characterization of anti-SIRPα.ex antibody.** The purified anti-SIRPα.ex antibody specifically recognizes SIRPα but not SIRPβ. Note that 100-110kD SIRPβ is still recognized by original anti-SIRPα.ex antisera (anti-SIRPα.ex-Pri) (A), however, after purification (absorption by immobilized SIRPβ recombinant), anti-SIRPα.ex antibody (IgG) does recognize SIRPα but not SIRPβ under both reducing (B) and non-reducing (D) condition. Importantly, the specificity of purified anti-SIRPα.ex antibody against SIRPα is verified via cross-WB using purified SIRPα and SIRPβ proteins (C). SIRPα and SIRPβ proteins were affinity isolated from human monocytes as previously described<sup>1,6</sup>. The recombinant GST fusion proteins containing SIRPβ extracellular domain (GST-SIRPβ) was prepared as previously described<sup>2</sup>. GST fusion proteins were produced in BL21 bacteria with 1 mM IPTG induction, followed by affinity purification using glutathione-Sepharose.

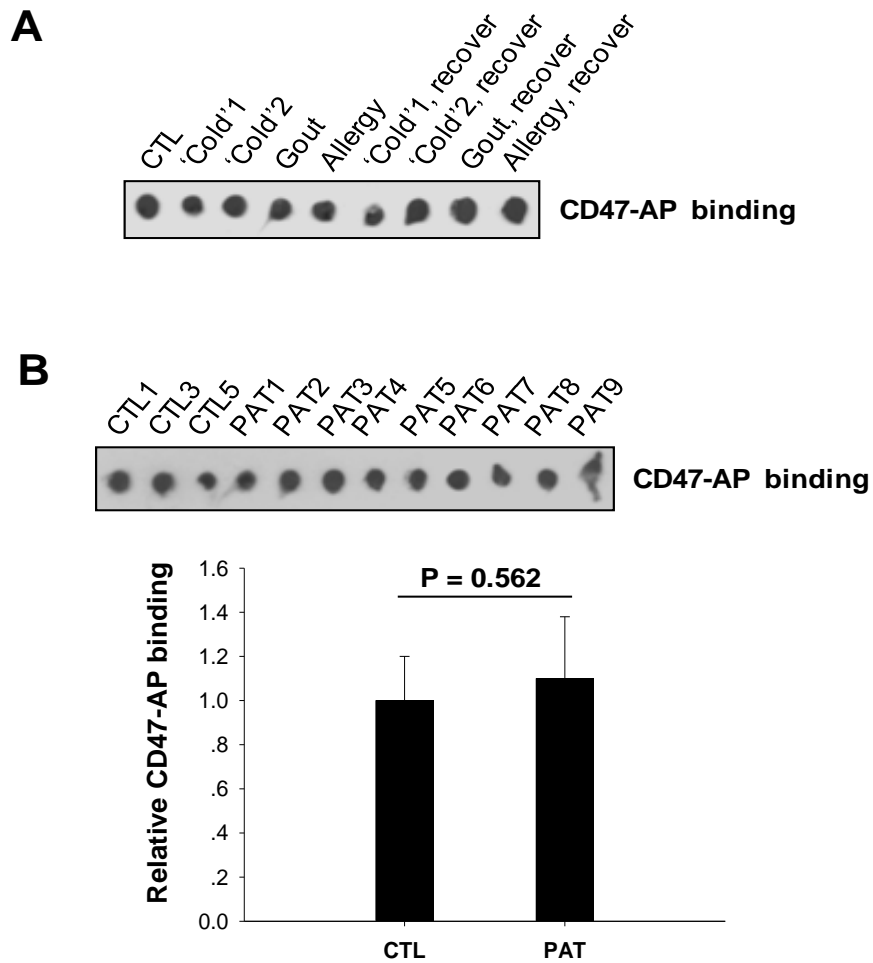

Supplementary Figure S2. **Assay of SIRP $\alpha$  in different PMNs binding to CD47.** The lysates of PMNs from different donors were immobilized on nitrocellulose by vacuum. The membrane was then incubated with CD47-AP (5  $\mu$ g/ml) followed by washing and color development using Luminol-based ECL chemiluminescent substrate for alkaline phosphatase. As seen, AP-CD47 equally binds to immobilized cell lysate from PMN of healthy donors and patients with inflammatory conditions. The results are the means  $\pm$  SE of three independent experiments. Statistical significance was tested by Student's *t* test

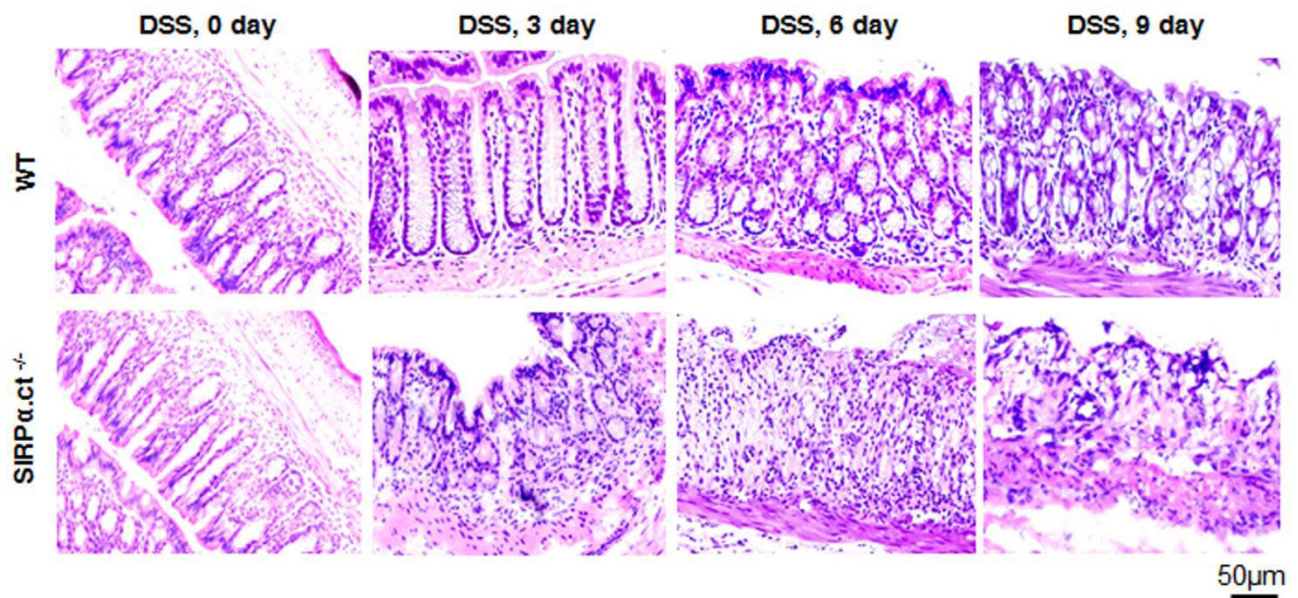

Supplementary Figure S3. **Inducing colitis in WT and SIRP $\alpha$ .ct<sup>-/-</sup> mice by 2% DSS.** The figure shows differential colon tissue damage in SIRP $\alpha$ .ct<sup>-/-</sup> mice and their WT littermates.

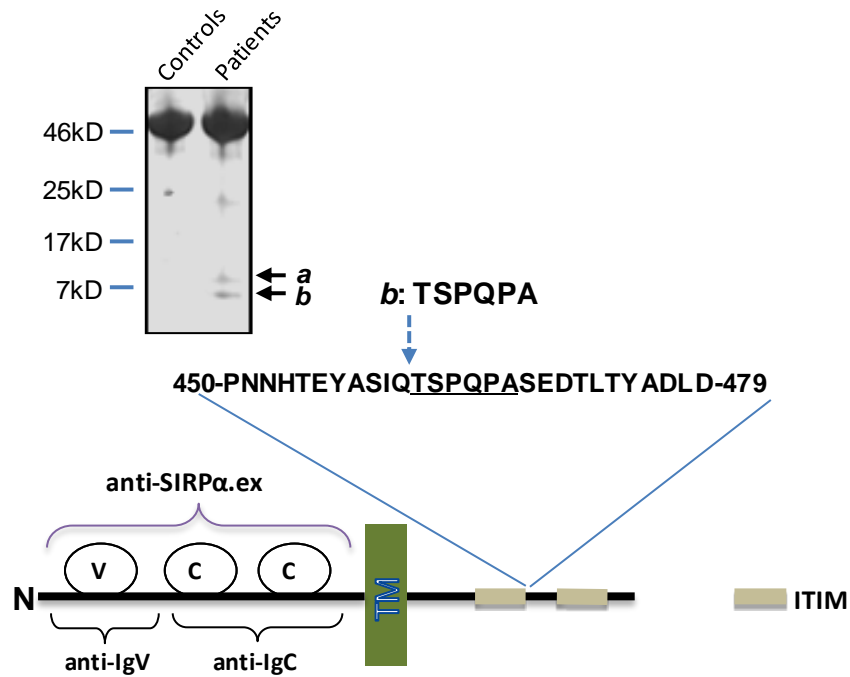

Supplementary Figure S4. **Identification of the potential cleavage site on SIRP $\alpha$  cytoplasmic domain.** Human PMN isolated from healthy donors and donors under inflammatory conditions were lysed in the absence of detergents followed by IP of the cleaved SIRP $\alpha$  cytoplasmic tail using anti-SIRP $\alpha$ .ct antibody. The resolved protein bands (*a* and *b*) by SDS-PAGE were subjected to N-terminal amino acid sequencing. The deduced sequence from band *b* was shown to match a position close to the proximal ITIM within the SIRP $\alpha$  cytoplasmic domain.

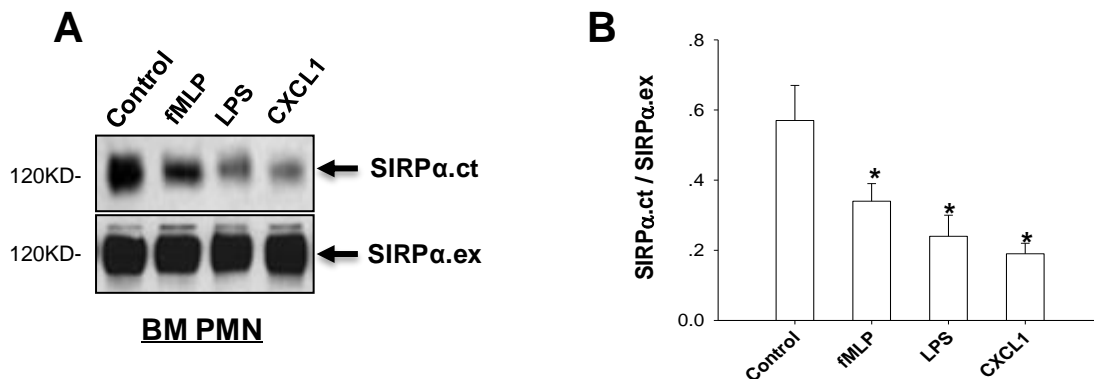

Supplementary Figure S5. **Expression pattern of SIRPα in mouse PMN after various treatments.** For lipopolysaccharide (LPS) treatment, LPS [*Escherichia coli* serotype 026:B6 (sigma), 0.3mg/kg body weight] was administered via nares every other day for 14 days to induce chronic bronchitis and lung inflammation. For CXCL1 and fMLP treatment, 300pg recombinant murine CXCL1 (R&D Systems) or  $10^{-7}$ M fMLP (Sigma), as well as control PBS, was intravenously injected into mice. In Western blot analysis, SIRPα in the same PMN sample was blotted by anti-SIRPα.ex and anti-SIRPα.ct antibodies, respectively. The results are the means of three different experiments. Statistical significance was tested by Student's *t* test \*,  $p < 0.05$ .

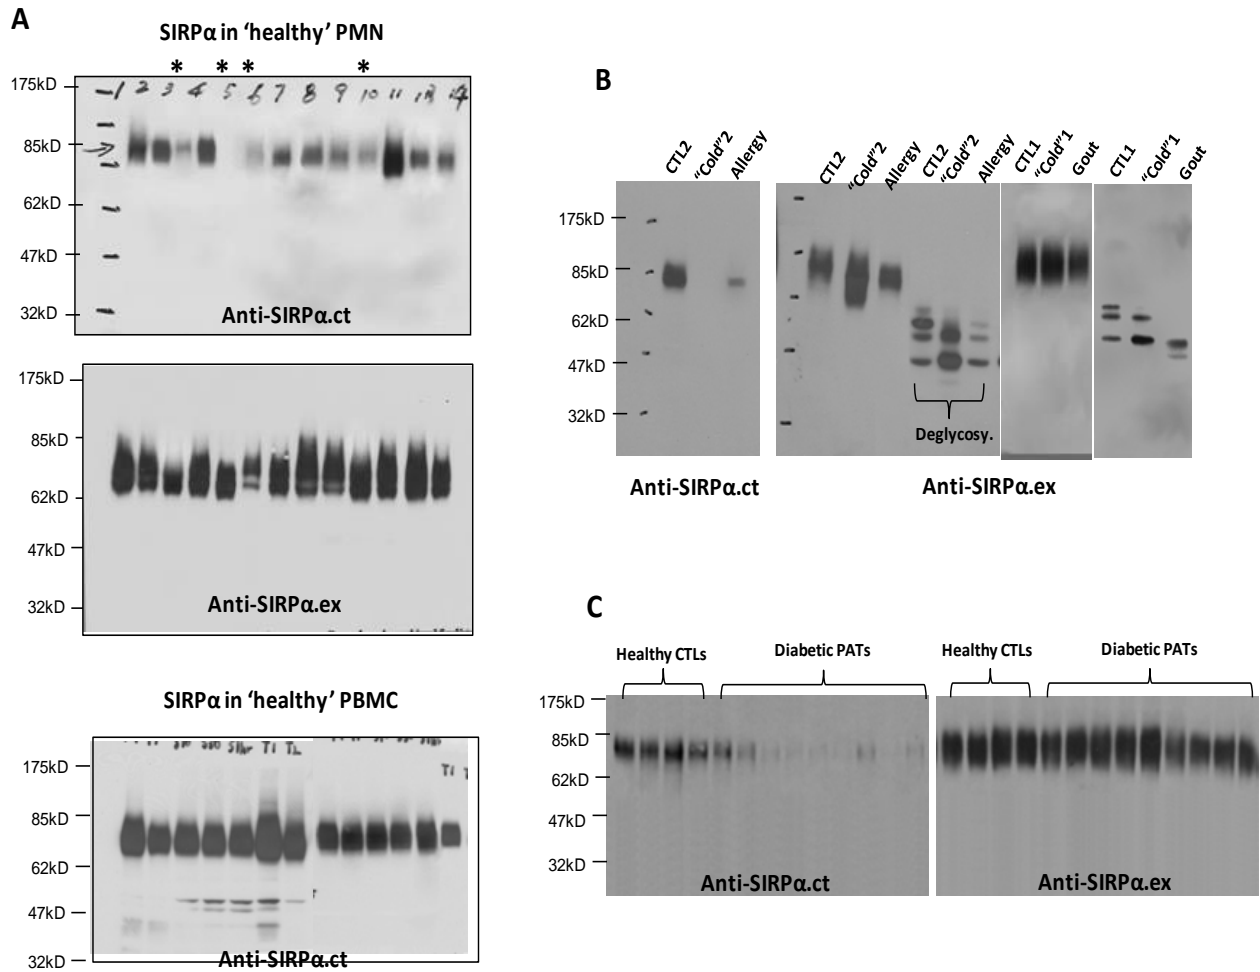

Supplementary Figure S6. **SIRP $\alpha$  in PMN under healthy and inflammatory conditions.** A) Detection of SIRP $\alpha$  in PMNs and monocytes (PBMCs) obtained from random selected healthy donors. B) Detection of SIRP $\alpha$  in PMNs obtained from inflammatory donors. C) Detection of SIRP $\alpha$  in PMNs obtained from healthy donors (CTL) and individuals with type 2 diabetes complicated with cardiovascular conditions (PAT).

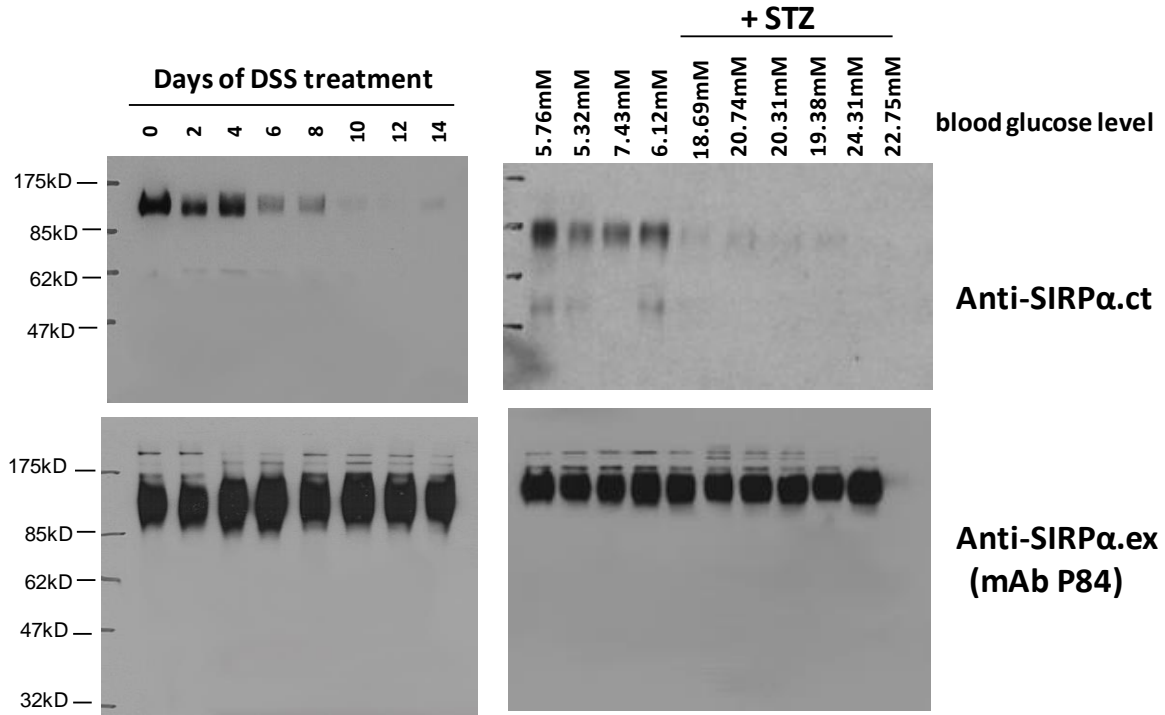

Supplementary Figure S7. SIRP $\alpha$  in PMNs from mice under 2% DSS treatment or STZ-induced diabetes.

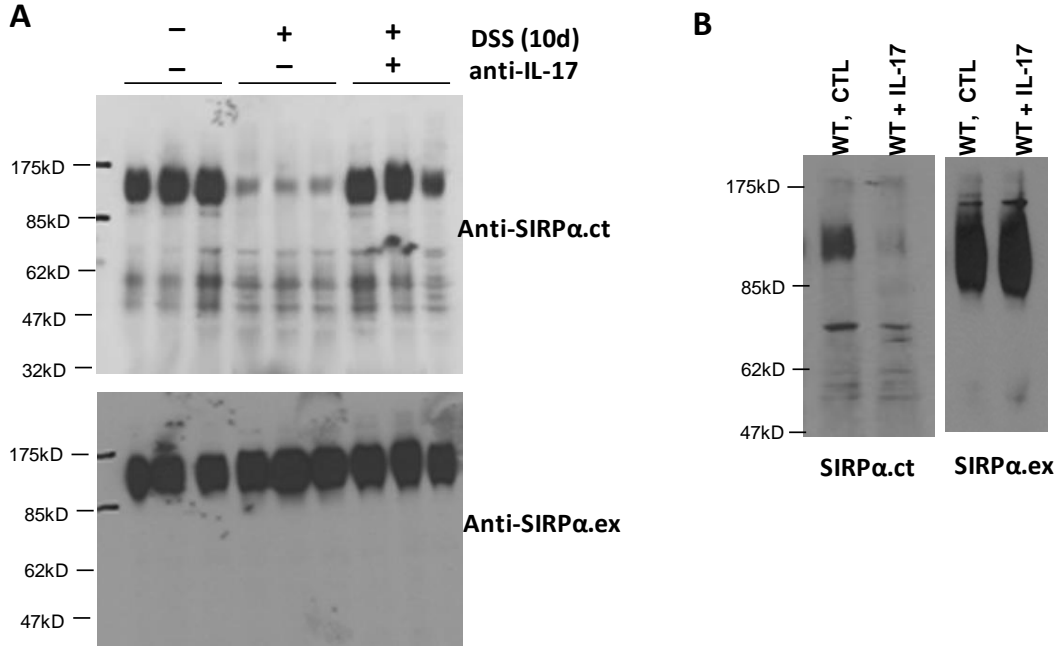

Supplementary Figure S8. **Effect of IL-17 on SIRP $\alpha$  cleavage in PMNs.** A) WT mice under DSS-induced colitis were administrated with, or without, a neutralization anti-IL-17 antibody. SIRP $\alpha$  in bone marrow PMNs was assessed by anti-SIRP $\alpha$ .ex and anti-SIRP $\alpha$ .ct antibodies. B) Inducing SIRP $\alpha$  cleavage in PMNs by IL-17A in healthy WT mice.



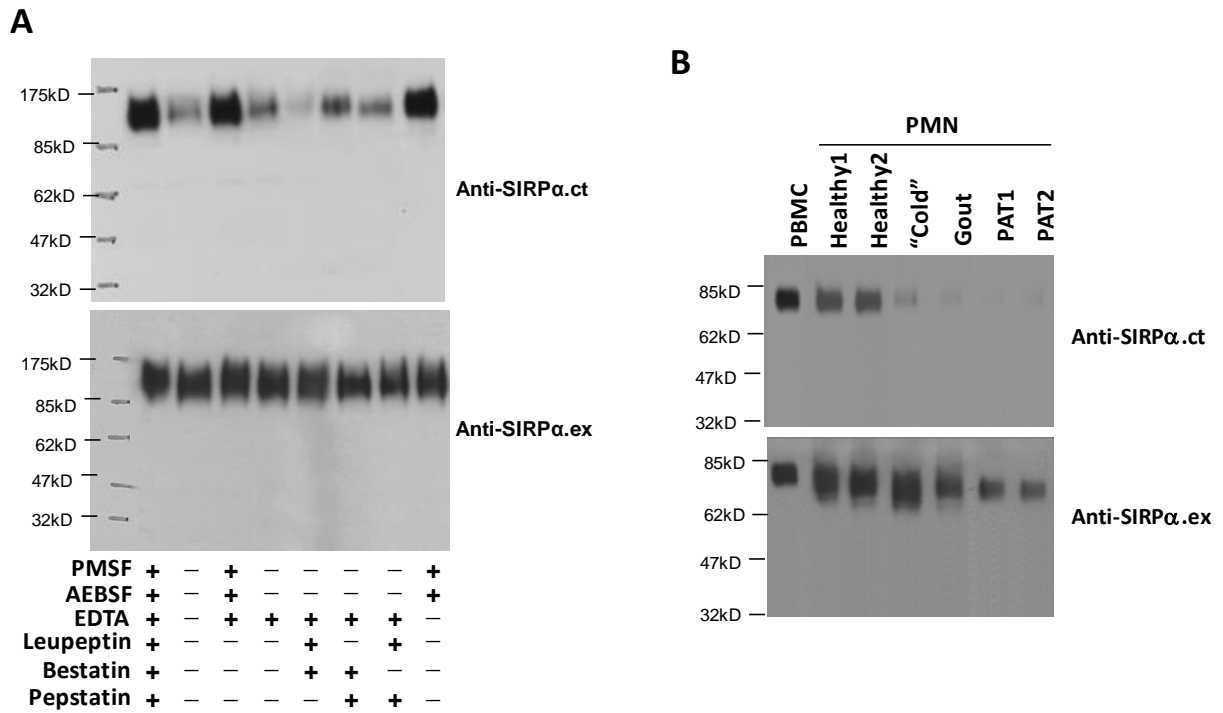

Supplementary Figure S9. **A) Cleavage of ITIM<sup>+</sup>SIRP $\alpha$  by PMN protease(s).** **B) Purification of SIRP $\alpha$  from different PMNs and PBMCs.** The presence and absence of SIRP $\alpha$  ITIM-containing cytoplasmic tail was confirmed by WB using anti- SIRP $\alpha$ .ex and anti- SIRP $\alpha$ .ct antibodies.
